# Supplementary figures and images for: Comparison of the Efficiency of Single-Locus Species Delimitation Methods: A Case Study of a Single Lake Fish Population in Comparison against the Barcodes from International Databases
Source: MDPI journal article supplement (doi:10.3390/w15101851), 2023-05-12

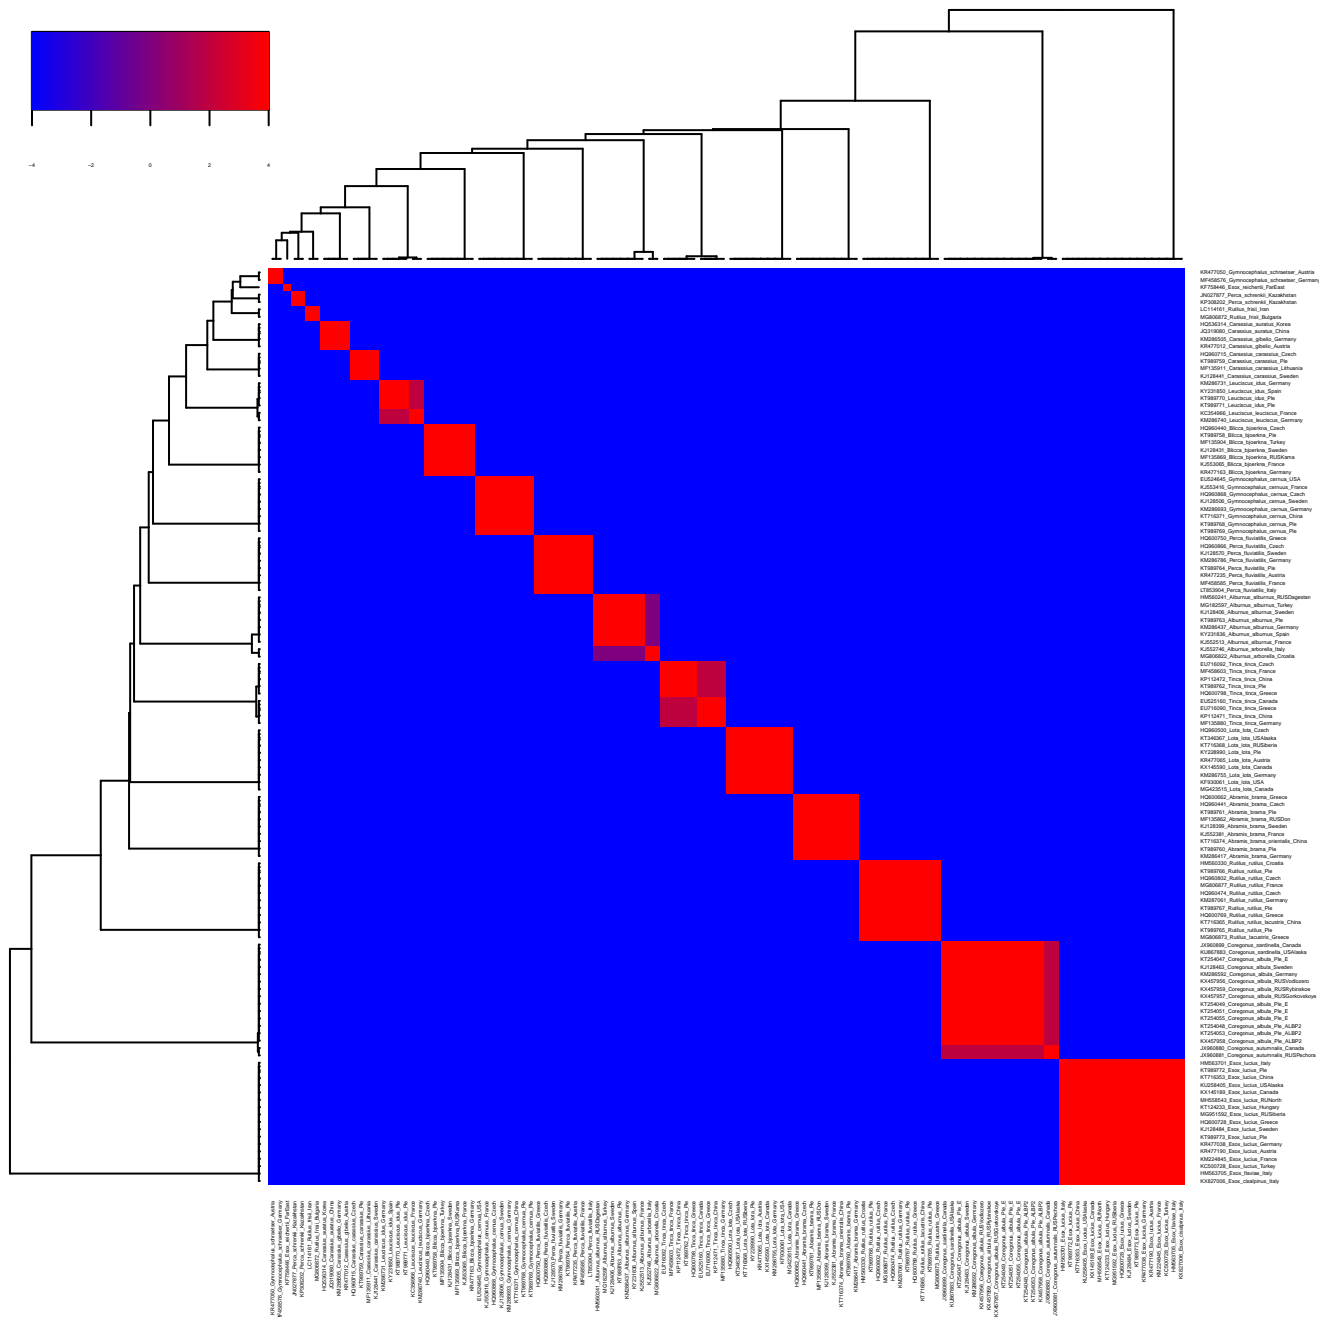

Supplement: s1 [file s1]

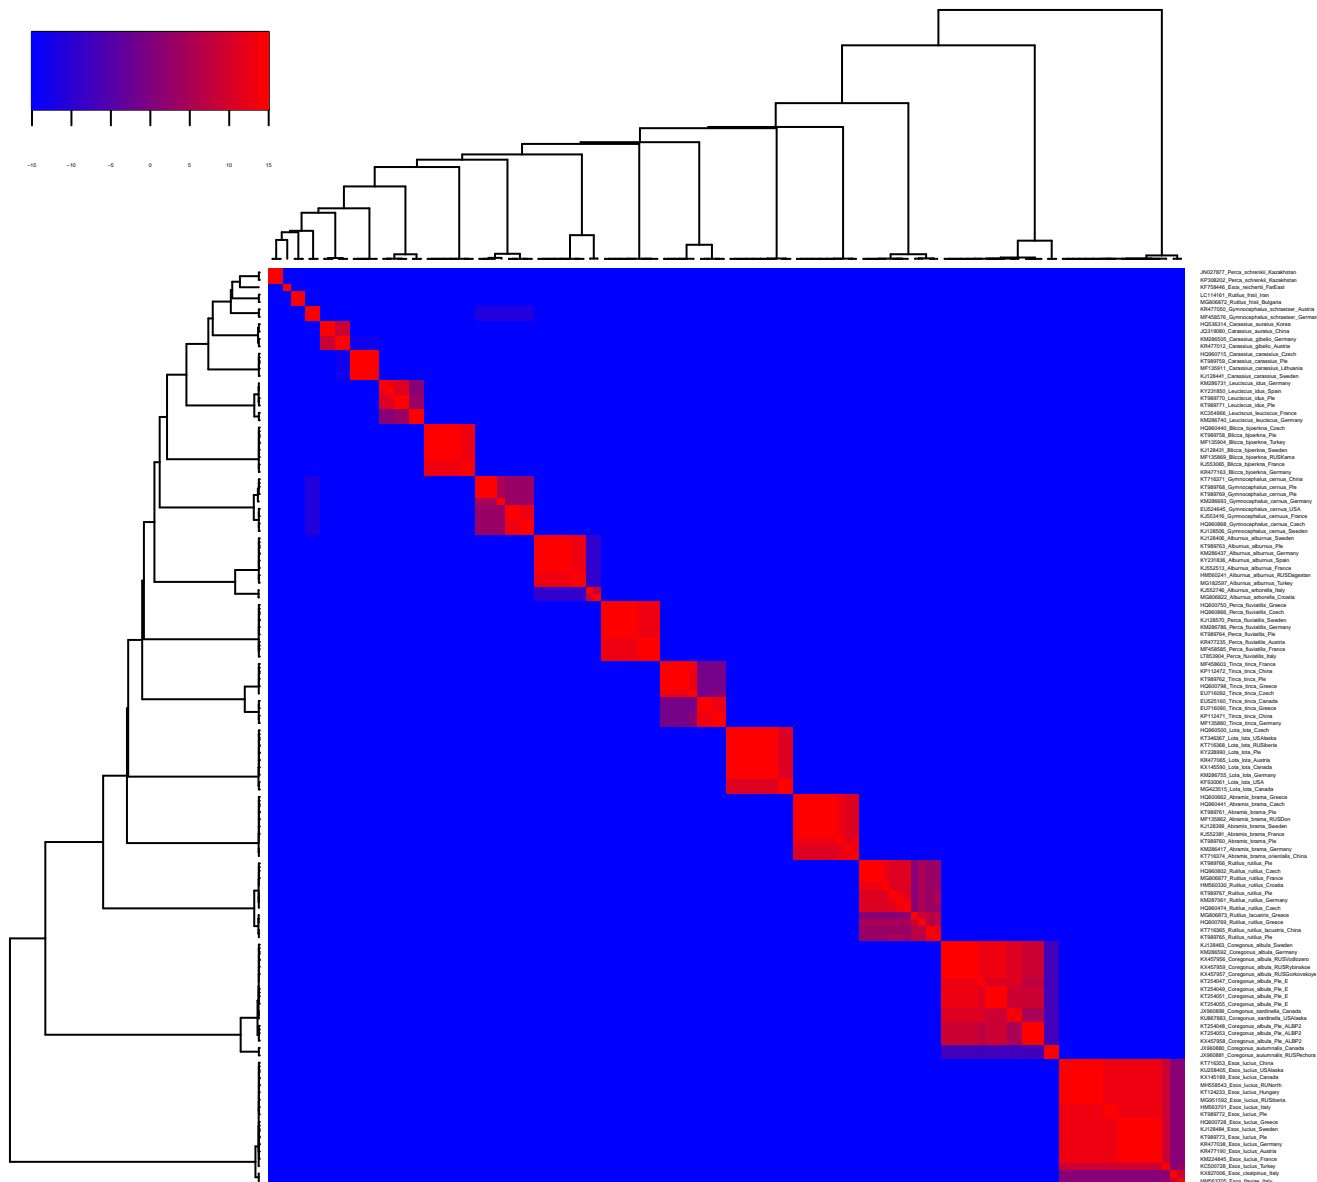[illegible]

Supplement: s1 [file s1]
